# Supplementary material
Source: PubMed Central journal article supplement (PMC4648826)
Supplement: MCB.00755-15_zmb999101049so1.pdf [file MCB.00755-15_zmb999101049so1.pdf]

## SUPPLEMENTARY DATA

Table S1: *Drosophila* lines used in this study

| Genotype                                                                                             | Source      | Stock number |
|------------------------------------------------------------------------------------------------------|-------------|--------------|
| <i>y[1] v[1]; P{y[+t7.7] v[+t1.8]=TRiP.JF02267}attP2</i>                                             | Bloomington | 26725        |
| <i>y[1] v[1]; P{y[+t7.7] v[+t1.8]=TRiP.HM05078}attP2</i>                                             | Bloomington | 28590        |
| <i>y<sup>1</sup> v<sup>1</sup>; P{TRiP.JF02931}attP2/TM3, Sb<sup>1</sup></i>                         | Bloomington | 28300        |
| <i>w<sup>1118</sup>; P{GD9296}v25218</i>                                                             | VDRC        | v25218       |
| <i>w[1118]; P{GD14303}v45815/TM3</i>                                                                 | VDRC        | v45815       |
| <i>P{KK113206}VIE-260B</i>                                                                           | VDRC        | v105054      |
| <i>P{KK105687}VIE-260B</i>                                                                           | VDRC        | v108900      |
| <i>P{PZ}pum<sup>01688</sup> ry<sup>506</sup>/TM3, ry<sup>RK</sup> Sb<sup>1</sup> Ser<sup>1</sup></i> | Bloomington | 11544        |
| <i>brat[1] rdo[1] hk[1] pr[1]/CyO</i>                                                                | Bloomington | 3988         |
| <i>w<sup>1118</sup></i>                                                                              | Lab stock   | N/A          |
| <i>dLsd1<sup>N</sup>/TM6B</i>                                                                        | Lab stock   | N/A          |
| <i>Engrailed-GAL4 GFP</i>                                                                            | Lab stock   | N/A          |
| <i>Actin5C-GAL4/CyO</i>                                                                              | Lab stock   | N/A          |

## PRIMERS

### Human ChIP primers

| Name                       | Sequence             |
|----------------------------|----------------------|
| Nanos1 -0.7KB FOR CHIP     | CTGAAGTCCCTGAGCACCTG |
| Nanos1 -0.7KB REV CHIP     | CCCTGGGCGAAATCCATACA |
| Nanos1 TSS FOR CHIP        | GCGTGTCCCTTCCGTCC    |
| Nanos1 TSS REV CHIP        | CCCAGGGGAAAGCCTCCAT  |
| Nanos1 1KB CHIP FOR        | TTTTGAAAAGCAGCCGACCG |
| Nanos1 1KB CHIP REV        | GTGGAATACACACCCAGCCT |
| Nanos1 +2kb neg1 Exon1 for | TACCCTCCCACCCTCACTTT |
| Nanos1 +2kb neg1 Exon1 rev | ATTGCCTTGCTTGGCAGGTA |
| Nanos2 -3kb neg1 for       | CCTTTCTTGGCCCCATCCAT |
| Nanos2 -3kb neg1 rev       | ACTCGTTCATGAAGCAGGCA |
| Nanos2 TSS for             | CTCAGGATGGGACACACCAC |

|                                |                        |
|--------------------------------|------------------------|
| Nanos2 TSS rev                 | AGGCTGGAGACCCAAGAGAT   |
| Nanos2 +0.8kb for              | CACTTCTCAGCCAGCCTTGT   |
| Nanos2 +0.8kb rev              | GAACCTCCAGGATTCCACGG   |
| Nanos3 -2kb neg1 for           | TGTCCAAGTCCTGAGCACAC   |
| Nanos3 -2kb neg1 rev           | TTCAGTGTCTCCCCGAGAT    |
| Nanos3 TSS for                 | TCCAGAGAGGGGAAGGAAGG   |
| Nanos3 TSS rev                 | CAGAGCCCTAACCAGGTGTG   |
| Nanos3 +3kb for                | ACTCCTGTGCTTTGTCTCGG   |
| Nanos3 +3kb rev                | GGAGGGGGAGGGAGAGAAAT   |
| Pumilio1 -35kb for             | AGAGGTCAGGGTGTGCAAAG   |
| Pumilio1 -35kb rev             | GGAGTAACAGAGCAGAGGGC   |
| Pumilio1 -20kb for             | TGCCTTCGTGTCCCTGTTTT   |
| Pumilio1 -20kb rev             | CCGGCCTAGGAGGAGCTAT    |
| Pumilio1 -22kb neg1 for        | TTTCTCCCCACCTTAGCAGAC  |
| Pumilio1 -22kb neg1 rev        | AAGTCATCTTAGGGCACACCA  |
| Pumilio1 -4kb for              | AGCCATGTGACCTTGAGAGC   |
| Pumilio1 -4kb rev              | ATGTGAGTCACTGCACCTGG   |
| Pumilio1 TSS for               | TCTTCTCTCTCTGGCGCTCT   |
| Pumilio1 TSS rev               | GAGCCTATCCCAGGATGCAC   |
| Pumilio1 +5kb neg1 for         | GCCCTCTCCTCAGTTGTCAC   |
| Pumilio1 +5kb neg1 rev         | TGGTTTGGTCTCATCCTGTTT  |
| Pumilio2 -33kb for             | GCAGATTAAAGCCCCACCCT   |
| Pumilio2 -33kb rev             | GCATGGCAGATTGCAAAGCA   |
| Pumilio2 -32kb for             | CTCCAGTCTCACTCCCTCCA   |
| Pumilio2 -32kb rev             | TGAGCGCCAGGAATTGGATT   |
| Pumilio2 -21kb for             | TCACACCTGGCCCAAATCTC   |
| Pumilio2 -21kb rev             | ATTTGCCTTCCGGAGTAGGT   |
| Pumilio2 TSS for               | TTCCAGGAAGGGAGATGGTT   |
| Pumilio2 TSS rev               | CTCGGGGAATGGGAGAGGTA   |
| Pumilio2 +2kb neg1 Intron1 for | TGGCTGGTTTCCATTCCAGT   |
| Pumilio2 +2kb neg1 Intron1 rev | AGGGGAGGAAGGAGACTTGT   |
| GAPDH GB F                     | TTAAAAAGTGCAGGGTCTGGC  |
| GAPDH GB R                     | TGCTGTAGCCAAATTCGTTGTC |

### Mouse ChIP primers

| Name               | Sequence             |
|--------------------|----------------------|
| mNos1 CDS chip for | GGAGCTTCAGGTGTGTGTGT |
| mNos1 CDS chip rev | CCTTGAGGATGTGTGTGGTG |

|                         |                         |
|-------------------------|-------------------------|
| mNos1 UTR CHIP FOR      | CCAATCCTTTAATCCTGACACTC |
| mNos1 UTR CHIP REV      | GCTATACCCATGGCCCTAAA    |
| mNos2 TSS CHIP FOR      | GTCCCATCCTGAGGCACTAT    |
| mNos2 TSS CHIP REV      | TGACTGCTGTTGAGTGGACA    |
| mNos2 UTR CHIP FOR      | GTTGATGGATCCCTGACTCC    |
| mNos2 UTR CHIP REV      | CTTCTCACCATGGGACACAC    |
| mNos3 TSS CHIP FOR      | ATGTAAGGCTGGATCCCAA     |
| mNos3 TSS CHIP REV      | GTTCAGGAGCTGCAGAGGAT    |
| mNos3 upstream CHIP FOR | GGGATGATGTTTGCTCAGTG    |
| mNos3 upstream CHIP REV | CACCTGCCCATGTATCTGTC    |
| mPum2 intron 1 CHIP for | CAGGGAACCTTCTGGGATT     |
| mPum2 intron 1 CHIP rev | GCCAGAGAGTACAGGCTGCT    |
| mPum2 TSS CHIP FOR      | AAGTACTCCAGAGCTCCCA     |
| mPum2 TSS CHIP REV      | CCCATTGATGACTGATGAGG    |
| mPum1 TSS CHIP FOR      | CGGAATCCATCTTCATCCTAC   |
| mPum1 TSS CHIP REV      | CGTCTCTAAGCCCTTCTCG     |
| mPum1 intron CHIP FOR   | AAGCAGGAGGATTGCCTAGA    |
| mPum1 intron CHIP REV   | GTGTGTGTGTGATGCAGAGG    |

#### Drosophila ChIP primers

| Name            | Sequence              |
|-----------------|-----------------------|
| Pum TSS F       | GCAAAGCCATAAGTGGGAAGC |
| Pum TSS R       | GCCAAACTCCTTGCATCCT   |
| Brat TSS F      | CCGTGGTAACGTCATCGAT   |
| Brat TSS R      | CCACAGAACAAAGCGAATTAA |
| Bun Chip1F      | CGATGGCAAGCCAACAACAA  |
| Bun Chip1R      | TGCAATTTTCTCAACGCGCA  |
| 2riNT Chip1F    | TCTATCCGCTGCGGGAAATC  |
| 2riNT Chip1R    | TTTCGGAGTTGAGTCGACCG  |
| 2riNT Chip2F    | GCGTACATTGAGTTCGCGTG  |
| 2riNT Chip2R    | CGTGCAGACGGACGTCTTAT  |
| Nos Prom Dist1F | GTTAGTTGGCGCGTAGCTTTA |
| Nos Prom Dist1R | GTTAAAATCGTGACGCAGAGG |
| Nos Prom Prox1F | GTGCTTGGTTTTTGGGTGAG  |
| Nos Prom Prox1R | CACTGCCCTCCAAGTTGCT   |
| Nos Gene 1F     | GCAGCAGTAGGTGTTGCAAAT |
| Nos Gene 1R     | CCCCACTGGTATCCAATACA  |

#### Human RT-qPCR primers

| Name                  | Sequence              |
|-----------------------|-----------------------|
| NANOS1 RT-PCR forward | CTGGAAGACCCATGTCCGGTT |
| NANOS1 RT-PCR reverse | GCTGCATTCCATAGTGTGGC  |
| NANOS2 RT-PCR forward | GAAGGGGGTTTGAGTACCCG  |
| NANOS2 RT-PCR reverse | GCTCAATACTCAGGGTCCCG  |
| NANOS3 RT-PCR forward | TTTCCAGGAAGACCCACCCT  |
| NANOS3 RT-PCR reverse | GCACTAGGGAAACGGCAGAT  |
| PUM1 RT-PCR forward   | GCAGGGACAGCAAACGGA    |
| PUM1 RT-PCR reverse   | CGCGCCTGCATTCACTAC    |
| PUM2 RT-PCR forward   | GTCAGCAAGGGCAGCAAGC   |
| PUM2 RT-PCR reverse   | AGGGCCAACCACTAAGGC    |
| HES1 RT-PCR forward   | GGCTGGAGAGGCGGCTAA    |
| HES1 RT-PCR reverse   | GAGAGGTGGGTTGGGGAGTT  |
| LSD1 RT-PCR forward   | GACCACAACAGACCCAGAAG  |
| LSD1 RT-PCR reverse   | CGGTGGACAAGCACAGTATC  |
| LSD2 RT-PCR forward   | AATTCTTTGCCAGTTTGCT   |
| LSD2 RT-PCR reverse   | TGCACTGGAGATTTGAGTTGA |

#### Drosophila RT-qPCR primers

| Name          | Sequence                   |
|---------------|----------------------------|
| RP49F         | TACAGGCCCAAGATCGTGAAG      |
| RP49R         | GACGCACTCTGTTGTCGATACC     |
| TubulinAlphaF | ACACTTCCAATAAAAACTCAATATGC |
| TubulinAlphaR | CCGTGCTCCAAGCAGTAGA        |
| dLsd1NtF      | ACGGTTTTGTCTGGCCAAGA       |
| dLsd1NtR      | GAGCGACTGATGTCCGAAA        |
| PumF          | CGAGAATCAGCCGTATCAGG       |
| PumR          | GGCTAACCAGACGCATCG         |
| NOSF          | GCGCGATCCTTGAAAATCT        |
| NOSR          | GCGAACTCCTGCATCACAT        |
| BRATF         | CAGGAATTGACTGCAATACAGG     |
| BRATR         | AGGCTTTCGTATATATTCTTTTCGAC |
| abd-AF        | CTACACTCGCTTCCAGACCCTC     |
| abd-AR        | CTTGATCTGTCGCTCGGTCAG      |
| BamF          | ATGTGTGGAACCGGAAGAGT       |
| BamR          | TTGTGCTCTAAGCAATCGCC       |
| VasaF         | GTCCAACGATGCAATTGAGA       |
| VasaR         | CAGCGCTCGTAAAATGTTGTAT     |

## Cloning primers

| Name                       | Sequence                                       |
|----------------------------|------------------------------------------------|
| <b>LSD1 3'UTR Xbal for</b> | GCTCTAGATGAGACAGATGCATTCTA                     |
| <b>LSD1 3'UTR Nhel rev</b> | GCGCTAGCAACCCCACACACCAAGGG                     |
| <b>LSD2 3'UTR Xbal for</b> | GCTCTAGATAAGAATTCGGTGGACCC                     |
| <b>LSD2 3'UTR Nhel rev</b> | GCGCTAGCATATTCTGTGTCTATAGT                     |
| <b>LSD2 PRE MUT FOR</b>    | GCTTCTAGGTATTTTGTATTCCACATATTTCTCCTAC<br>TGGG  |
| <b>LSD2 PRE MUT REV</b>    | CCCAGTAGGAGGAAATATGTGGAATACAAAATACCTA<br>GAAGC |
